# Supplementary material for: Hierarchical construction of SHG-active polar crystals by using multi-component crystals
Source: Royal Society of Chemistry journal article supplement (doi:10.1039/c6cc07544d), 2016-01-01
Supplement: c6cc07544d1.pdf [file c6cc07544d1.pdf]

Electronic Supplementary Information  
For

## **Hierarchical Construction of SHG-active Polar Crystals by Using Multi-component**

Tetsuya Miyano, Tatsuya Sakai, Ichiro Hisaki, Hideki Ichida, Yasuo Kanematsu, and Norimitsu Tohnai\*

Department of Material and Life Science, Graduate School of Engineering, Osaka University, 2-1  
Yamadaoka, Suita, Osaka 565-0871, Japan.

E-mail: [tohnai@mls.eng.osaka-u.ac.jp](mailto:tohnai@mls.eng.osaka-u.ac.jp)

Fax: (+81) 6 6879 7404

## Experimental section

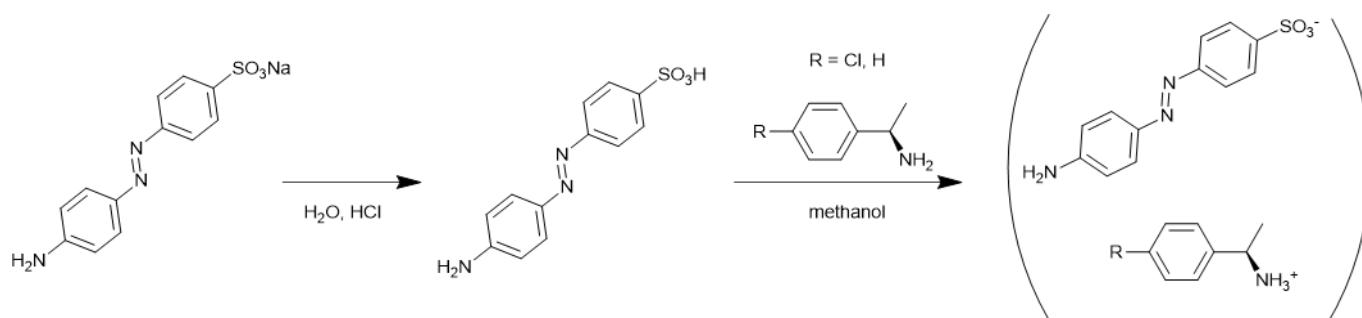

**Preparation of 4-aminoazobenzene-4-sulfonic acid (AAS):** Sodium (E)-4-((4-aminophenyl)diazenyl) benzenesulfonate (0.898g, 3.00 mmol) was dissolved into water and 0.5 M aqueous solution of HCl was added to yield precipitates. The precipitates were dried in vacuo to yield AAS (0.730g, 2.63 mmol, 88 %) as a pale orange powder.

**Preparation of salt 1 and salt 2:** AAS and (R)-1-(4-Chlorophenyl) ethylamine or (R)-1-Phenylethylamine were mixed in methanol in a 1:1 molar ratio. The solution was evaporated to yield orange powder of the crude salt.

**Preparation of single crystals:** AAS single crystals were prepared by recrystallization from water. The crude salts 1 and 2 were dissolved in methanol and then various guest solvents were added to the solution. Slow evaporation of the solvent gave each single crystals.

**Crystallographic analysis of single crystals:** X-ray diffraction data except for AAS crystal were collected on a Rigaku R-Axis RAPID diffractometer with a 2D area detector by using graphite-monochromatized Cu K $\alpha$  radiation ( $\lambda = 1.54178 \text{ \AA}$ ). Diffraction data of AAS crystal collected on a two-dimensional X-ray detector (PILATUS 200K/R) equipped in Rigaku XtaLAB PRO diffractometer using thin multi-layer mirror monochromated Cu-K $\alpha$  radiation ( $\lambda = 1.54187 \text{ \AA}$ ). The cell refinements were performed with a software CrysAlisPro 1.171.39.5a.<sup>S1</sup> A direct method of SHELXT<sup>S2</sup> was used for the structure solution of the crystals. All calculations were performed with the observed reflections [ $I > 2\sigma(I)$ ] with the program CrystalStructure crystallographic software packages<sup>S3</sup>, except for refinement which was performed by SHELXL<sup>S4</sup>. All non-hydrogen atoms were refined with anisotropic displacement parameters, and hydrogen atoms were placed in idealized positions and refined as rigid atoms with the relative isotropic displacement parameters.

**Powder SHG measurement:** The powder SHG measured by the Kurtz–Perry method.<sup>S5</sup> The samples were placed in a quartz cell and measured SHG signals at 1.4, 1.5, 1.6  $\mu\text{m}$  by using an optical parametric amplifier and a Nd: YAG solid-state laser (1064 nm, 1 kHz). We measured the intensity of the frequency-doubled output emitted from the sample using a photomultiplier tube. The second harmonic efficiency of the sample was compared to that of a standard powder sample of Urea.

S1. Rigaku Oxford Diffraction (2015), Software CrysAlisPro 1.171.39.5a Rigaku Corporation, Tokyo, Japan.

S2. SHELXT Version 2014/5. Sheldrick, G. M. Acta Cryst. 2014, A70, C1437.

S3. Rigaku (2015). CrystalStructure. Versions 4.2. Rigaku Corporation, Tokyo, Japan.

S4. SHELXL Version 2014/7. Sheldrick, G.M. Acta Cryst. 2008, A64, 112-122.

S5. Kurtz, S. K.; Perry, T. T. J. Appl. Phys. 1968, 39, 3798–3792.

**Table S1.** X-ray crystallographic parameters for the crystals.

| crystal                                   | AAS                                                             | 1-GF                                                                                                       | 1-DMSO                                                                                                                                          |
|-------------------------------------------|-----------------------------------------------------------------|------------------------------------------------------------------------------------------------------------|-------------------------------------------------------------------------------------------------------------------------------------------------|
| Formula                                   | C <sub>12</sub> H <sub>11</sub> N <sub>3</sub> O <sub>3</sub> S | (C <sub>12</sub> H <sub>11</sub> N <sub>3</sub> O <sub>3</sub> S)•(C <sub>8</sub> H <sub>10</sub> Cl<br>N) | (C <sub>12</sub> H <sub>11</sub> N <sub>3</sub> O <sub>3</sub> S)•(C <sub>8</sub> H <sub>10</sub> ClN<br>) • (C <sub>2</sub> H <sub>6</sub> OS) |
| <i>F</i> <sub>w</sub>                     | 432.92                                                          | 432.92                                                                                                     | 511.05                                                                                                                                          |
| Crystal system                            | Triclinic                                                       | Monoclinic                                                                                                 | Monoclinic                                                                                                                                      |
| Space group                               | <i>P</i> -1                                                     | <i>P</i> 2 <sub>1</sub>                                                                                    | <i>P</i> 2 <sub>1</sub>                                                                                                                         |
| Temperature (K)                           | 213                                                             | 213                                                                                                        | 213                                                                                                                                             |
| <i>a</i> (Å)                              | 5.8245(3)                                                       | 7.3493(2)                                                                                                  | 5.99452(11)                                                                                                                                     |
| <i>b</i> (Å)                              | 7.5038(4)                                                       | 6.04446(19)                                                                                                | 23.7139(4)                                                                                                                                      |
| <i>c</i> (Å)                              | 13.8162(4)                                                      | 23.3114(6)                                                                                                 | 9.33438(17)                                                                                                                                     |
| <i>α</i>                                  | 94.785(3)                                                       | 90                                                                                                         | 90                                                                                                                                              |
| <i>β</i>                                  | 94.970(3)                                                       | 94.6950(17)                                                                                                | 108.5280(11)                                                                                                                                    |
| <i>γ</i>                                  | 95.755(4)                                                       | 90                                                                                                         | 90                                                                                                                                              |
| <i>V</i> (Å <sup>3</sup> )                | 595.96(5)                                                       | 1032.07(5)                                                                                                 | 1258.14(4)                                                                                                                                      |
| <i>Z</i>                                  | 2                                                               | 2                                                                                                          | 2                                                                                                                                               |
| reflections<br>observed                   | 5827                                                            | 11000                                                                                                      | 12525                                                                                                                                           |
| reflections<br>unique                     | 2411                                                            | 3640                                                                                                       | 4386                                                                                                                                            |
| <i>R</i> 1 [ <i>I</i> > 2.0σ( <i>I</i> )] | 0.0560                                                          | 0.0724                                                                                                     | 0.0789                                                                                                                                          |
| <i>R</i> <sub>w</sub> ( <i>all data</i> ) | 0.1506                                                          | 0.1559                                                                                                     | 0.1667                                                                                                                                          |
| CCDC no.                                  | 1504254                                                         | 1504262                                                                                                    | 1504257                                                                                                                                         |

**Table S1.** X-ray crystallographic parameters for the crystals.

| crystal                                   | <b>1-Dioxane</b>                                                                                                                                             | <b>1-DMF</b>                                                                                                                                    | <b>1-DMA</b>                                                                                                                                    |
|-------------------------------------------|--------------------------------------------------------------------------------------------------------------------------------------------------------------|-------------------------------------------------------------------------------------------------------------------------------------------------|-------------------------------------------------------------------------------------------------------------------------------------------------|
| Formula                                   | (C <sub>12</sub> H <sub>11</sub> N <sub>3</sub> O <sub>3</sub> S)•(C <sub>8</sub> H <sub>10</sub> Cl<br>N) • (C <sub>4</sub> H <sub>8</sub> O <sub>2</sub> ) | (C <sub>12</sub> H <sub>11</sub> N <sub>3</sub> O <sub>3</sub> S)•(C <sub>8</sub> H <sub>10</sub> Cl<br>N) • (C <sub>3</sub> H <sub>7</sub> NO) | (C <sub>12</sub> H <sub>11</sub> N <sub>3</sub> O <sub>3</sub> S)•(C <sub>8</sub> H <sub>10</sub> ClN<br>) • (C <sub>4</sub> H <sub>9</sub> NO) |
| <i>F</i> <sub>w</sub>                     | 521.03                                                                                                                                                       | 506.02                                                                                                                                          | 520.05                                                                                                                                          |
| Crystal system                            | Monoclinic                                                                                                                                                   | Triclinic                                                                                                                                       | Monoclinic                                                                                                                                      |
| Space group                               | <i>P</i> 2 <sub>1</sub>                                                                                                                                      | <i>P</i> 1                                                                                                                                      | <i>P</i> 2 <sub>1</sub>                                                                                                                         |
| Temperature (K)                           | 213                                                                                                                                                          | 213                                                                                                                                             | 213                                                                                                                                             |
| <i>a</i> (Å)                              | 6.00155(11)                                                                                                                                                  | 5.94757(14)                                                                                                                                     | 6.11235(13)                                                                                                                                     |
| <i>b</i> (Å)                              | 26.1427(5)                                                                                                                                                   | 9.5911(2)                                                                                                                                       | 28.1898(6)                                                                                                                                      |
| <i>c</i> (Å)                              | 8.40735(15)                                                                                                                                                  | 11.4509(3)                                                                                                                                      | 7.71338(17)                                                                                                                                     |
| <i>α</i>                                  | 90                                                                                                                                                           | 83.8975(16)                                                                                                                                     | 90                                                                                                                                              |
| <i>β</i>                                  | 105.2470(9)                                                                                                                                                  | 82.0150(15)                                                                                                                                     | 92.9285(13)                                                                                                                                     |
| <i>γ</i>                                  | 90                                                                                                                                                           | 71.9997(15)                                                                                                                                     | 90                                                                                                                                              |
| <i>V</i> (Å <sup>3</sup> )                | 1272.66(4)                                                                                                                                                   | 613.82(3)                                                                                                                                       | 1327.33(5)                                                                                                                                      |
| <i>Z</i>                                  | 2                                                                                                                                                            | 1                                                                                                                                               | 2                                                                                                                                               |
| reflections<br>observed                   | 13914                                                                                                                                                        | 6470                                                                                                                                            | 13867                                                                                                                                           |
| reflections<br>unique                     | 4492                                                                                                                                                         | 3604                                                                                                                                            | 4695                                                                                                                                            |
| <i>R</i> 1 [ <i>I</i> > 2.0σ( <i>I</i> )] | 0.0499                                                                                                                                                       | 0.0851                                                                                                                                          | 0.1118                                                                                                                                          |
| <i>R</i> <sub>w</sub> ( <i>all data</i> ) | 0.1047                                                                                                                                                       | 0.2281                                                                                                                                          | 0.2752                                                                                                                                          |
| CCDC no.                                  | 1504260                                                                                                                                                      | 1504255                                                                                                                                         | 1504256                                                                                                                                         |

**Table S1.** X-ray crystallographic parameters for the crystals.

| crystal                                   | <b>1-DEF</b>                                                                                                                                     | <b>2-Dioxane</b>                                                                                                                                           | <b>2-DMA</b>                                                                                                                                 |
|-------------------------------------------|--------------------------------------------------------------------------------------------------------------------------------------------------|------------------------------------------------------------------------------------------------------------------------------------------------------------|----------------------------------------------------------------------------------------------------------------------------------------------|
| Formula                                   | (C <sub>12</sub> H <sub>11</sub> N <sub>3</sub> O <sub>3</sub> S)•(C <sub>8</sub> H <sub>10</sub> Cl<br>N) • (C <sub>5</sub> H <sub>11</sub> NO) | (C <sub>12</sub> H <sub>11</sub> N <sub>3</sub> O <sub>3</sub> S)•(C <sub>8</sub> H <sub>11</sub> N<br>) • (C <sub>4</sub> H <sub>8</sub> O <sub>2</sub> ) | (C <sub>12</sub> H <sub>11</sub> N <sub>3</sub> O <sub>3</sub> S)•(C <sub>8</sub> H <sub>11</sub> N) •<br>(C <sub>4</sub> H <sub>9</sub> NO) |
| Mw                                        | 534.07                                                                                                                                           | 486.58                                                                                                                                                     | 485.60                                                                                                                                       |
| Crystal system                            | Monoclinic                                                                                                                                       | Monoclinic                                                                                                                                                 | Monoclinic                                                                                                                                   |
| Space group                               | <i>P</i> 2 <sub>1</sub>                                                                                                                          | <i>P</i> 2 <sub>1</sub>                                                                                                                                    | <i>P</i> 2 <sub>1</sub>                                                                                                                      |
| Temperature (K)                           | 213                                                                                                                                              | 213                                                                                                                                                        | 213                                                                                                                                          |
| a (Å)                                     | 6.26161(11)                                                                                                                                      | 6.06973(12)                                                                                                                                                | 6.19100(11)                                                                                                                                  |
| b (Å)                                     | 25.9240(5)                                                                                                                                       | 23.5497(5)                                                                                                                                                 | 26.0113(5)                                                                                                                                   |
| c (Å)                                     | 8.62429(16)                                                                                                                                      | 9.2011(2)                                                                                                                                                  | 8.06978(15)                                                                                                                                  |
| α                                         | 90                                                                                                                                               | 90                                                                                                                                                         | 90                                                                                                                                           |
| β                                         | 102.2264(7)                                                                                                                                      | 108.6090(12)                                                                                                                                               | 102.6890(10)                                                                                                                                 |
| γ                                         | 90                                                                                                                                               | 90                                                                                                                                                         | 90                                                                                                                                           |
| V (Å <sup>3</sup> )                       | 1368.19(4)                                                                                                                                       | 1246.44(5)                                                                                                                                                 | 1267.79(4)                                                                                                                                   |
| Z                                         | 2                                                                                                                                                | 2                                                                                                                                                          | 2                                                                                                                                            |
| reflections<br>observed                   | 14234                                                                                                                                            | 13460                                                                                                                                                      | 14197                                                                                                                                        |
| reflections<br>unique                     | 4864                                                                                                                                             | 4359                                                                                                                                                       | 4506                                                                                                                                         |
| <i>R</i> 1 [ <i>I</i> > 2.0σ( <i>I</i> )] | 0.0739                                                                                                                                           | 0.0814                                                                                                                                                     | 0.0764                                                                                                                                       |
| <i>R</i> w ( <i>all data</i> )            | 0.1847                                                                                                                                           | 0.1545                                                                                                                                                     | 0.1583                                                                                                                                       |
| CCDC no.                                  | 1504253                                                                                                                                          | 1504259                                                                                                                                                    | 1504258                                                                                                                                      |

**Table S1.** X-ray crystallographic parameters for the crystals.

| crystal                                   | <b>2-DEF</b>                                                                                                                                    |
|-------------------------------------------|-------------------------------------------------------------------------------------------------------------------------------------------------|
| Formula                                   | (C <sub>12</sub> H <sub>11</sub> N <sub>3</sub> O <sub>3</sub> S)•(C <sub>8</sub> H <sub>11</sub> N)<br>) • (C <sub>5</sub> H <sub>11</sub> NO) |
| <i>F<sub>w</sub></i>                      | 499.63                                                                                                                                          |
| Crystal system                            | Monoclinic                                                                                                                                      |
| Space group                               | <i>P</i> 2 <sub>1</sub>                                                                                                                         |
| Temperature (K)                           | 213                                                                                                                                             |
| <i>a</i> (Å)                              | 6.21672(11)                                                                                                                                     |
| <i>b</i> (Å)                              | 26.5810(5)                                                                                                                                      |
| <i>c</i> (Å)                              | 7.98985(14)                                                                                                                                     |
| <i>α</i>                                  | 90                                                                                                                                              |
| <i>β</i>                                  | 99.5040(7)                                                                                                                                      |
| <i>γ</i>                                  | 90                                                                                                                                              |
| <i>V</i> (Å <sup>3</sup> )                | 1302.17(4)                                                                                                                                      |
| <i>Z</i>                                  | 2                                                                                                                                               |
| reflections                               | 13515                                                                                                                                           |
| observed                                  |                                                                                                                                                 |
| reflections                               | 4617                                                                                                                                            |
| unique                                    |                                                                                                                                                 |
| <i>R</i> 1 [ <i>I</i> > 2.0σ( <i>I</i> )] | 0.0513                                                                                                                                          |
| <i>R</i> <sub>w</sub> ( <i>all data</i> ) | 0.1175                                                                                                                                          |
| CCDC no.                                  | 1504261                                                                                                                                         |
